# Supplementary material
Source: PubMed Central journal article supplement (PMC7434009)
Supplement: str-51-2674-s001.pdf [file str-51-2674-s001.pdf]

# SUPPLEMENTAL MATERIAL

## Clinical Course and Mortality of Stroke Patients with Coronavirus Disease 2019

### in Wuhan, China

Lijuan Zhang; Wenwu Sun; Yujun Wang; Xiaopin Wang; Yanli Liu; Su Zhao; Ding

Long; Liangkai Chen; Li Yu

**Contents: Figure I.** Study flow diagram.

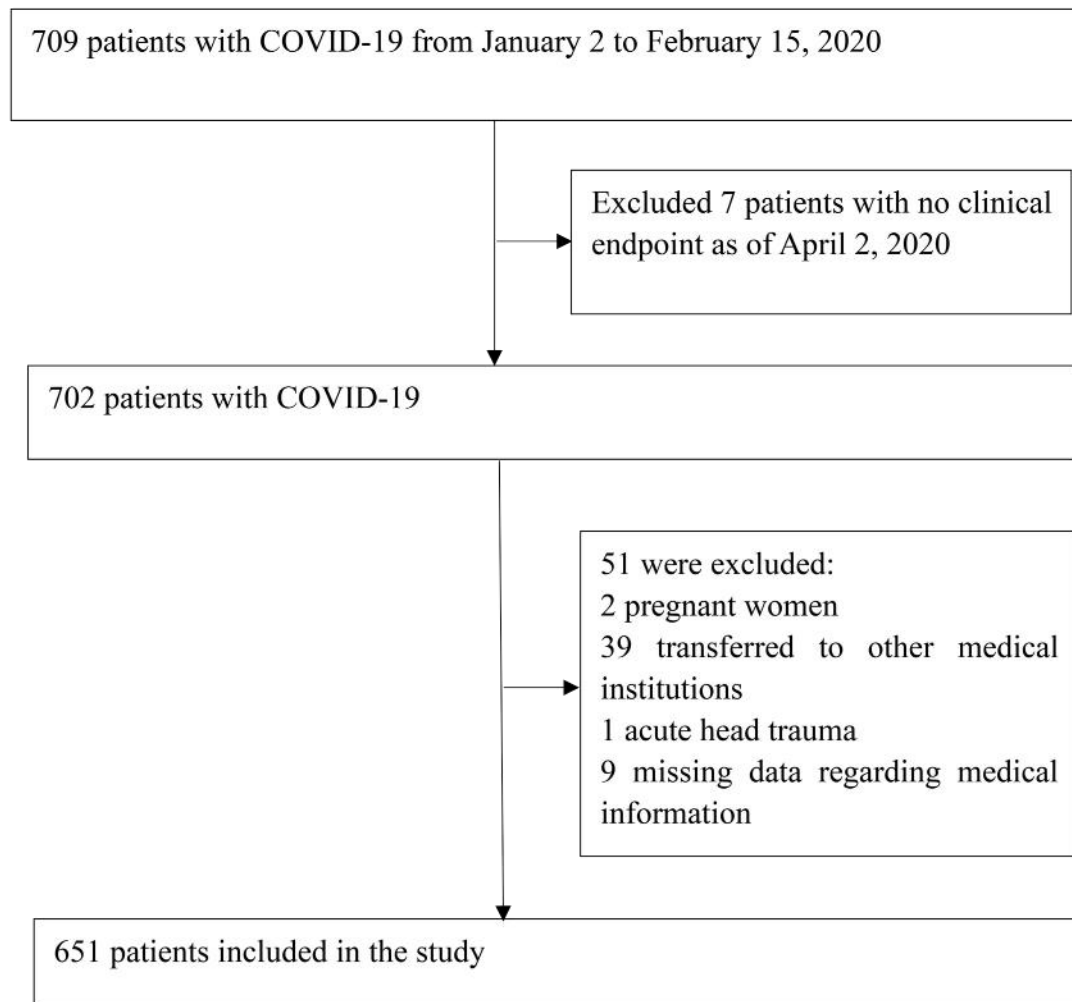

**Figure I.** Study flow diagram
